# Supplementary material for: Activation of a nucleotide-dependent RCK domain requires binding of a cation cofactor to a conserved site
Source: eLife. 2019 Dec 23;8:e50661. doi: 10.7554/eLife.50661 (PMC6957272; doi:10.7554/eLife.50661)
Supplement: Figure 6—source data 1. [file elife-50661-fig6-data1.xlsx]

## Sheet: Figure6c
		Flux rate constants (s-1)
	Replica	KtrAB-ATP	KtrAB-ATP+Mg	KtrAB-ADP	KtrAB-ADP+Mg	KtrAE125QB-ATP	KtrAE125QB-ATP+Mg	KtrB-ATP	KtrB-ATP+Mg	KtrAR16AB-ATP	KtrAR16AB-ATP+Mg
	1	0.01	0.084	0.004	0.007	0.001	0.004	0.003	0.009	0.007	0.08
	2	0.009	0.095	0.004	0.007	0.001	0.004	0.003	0.009	0.007	0.078
	3	0.01	0.089	0.004	0.007	0.001	0.004	0.003	0.009	0.008	0.081
	4	0.01	0.104	0.004	0.007	0.001	0.004	0.004	0.01	0.008	0.084
	5	0.012	0.101	0.003	0.007	0.001	0.004	0.004	0.009	0.009	0.082
	6	0.012	0.106	0.003	0.006	0.001	0.004	0.004	0.009	0.008	0.081
	7	0.011			0.006
		Flux rate constants (s-1)
		KtrAB-ATP	KtrAB-ATP+Mg	KtrAB-ADP	KtrAB-ADP+Mg	KtrAE125QB-ATP	KtrAE125QB-ATP+Mg	KtrB-ATP	KtrB-ATP+Mg	KtrAR16AB-ATP	KtrAR16AB-ATP+Mg
	Mean	0.011	0.096	0.004	0.007	0.001	0.004	0.004	0.009	0.008	0.081
	SD	0.001	0.008	0.001	0.001	0.001	0.001	0.001	0.001	0.001	0.002
