# Supplementary material for: Activation of a nucleotide-dependent RCK domain requires binding of a cation cofactor to a conserved site
Source: eLife. 2019 Dec 23;8:e50661. doi: 10.7554/eLife.50661 (PMC6957272; doi:10.7554/eLife.50661)
Supplement: Figure 7—source data 1. [file elife-50661-fig7-data1.xlsx]

## Sheet: Figure7b
		Flux rate constants (s-1)
	Replica	No cation added	0.7mM Mg	0.7mM Ca	2mM Mg	2mM Ca	5mM Mg	5mM Ca
	1	0.028	0.067	0.085	0.088	0.091	0.123	0.011
	2	0.026	0.067	0.074	0.086	0.09	0.099	0.01
	3	0.031	0.067	0.087	0.09	0.093	0.098	0.01
	4	0.031				0.092
	5	0.026
		Flux rate constants(s-1)
		No cation added	0.7mM Mg	0.7mM Ca	2mM Mg	2mM Ca	5mM Mg	5mM Ca
	Mean	0.028	0.067	0.082	0.088	0.092	0.107	0.01
	SD	0.002	0.001	0.006	0.002	0.001	0.012	0.001
