# Supplementary material for: Activation of a nucleotide-dependent RCK domain requires binding of a cation cofactor to a conserved site
Source: eLife. 2019 Dec 23;8:e50661. doi: 10.7554/eLife.50661 (PMC6957272; doi:10.7554/eLife.50661)
Supplement: Figure 8—source data 1. [file elife-50661-fig8-data1.xlsx]

## Sheet: Figure8c
		Flux rate constans (s-1)
	Replica	KtrAB-ATP_150mMChCl	KtrAB-ATP_150mMChCl+0.7mM Mg	KtrAB-ATP_150mMChCl+2mM Mg	KtrAB-ATP_20mMChCl	KtrAB-ADP	KtrAE125QB-ATP	KtrB-ATP	KtrAR16AB-ATP
	1	0.064	0.058	0.088	0.028	0.003	0.004	0.005	0.041
	2	0.066	0.058	0.086	0.026	0.005	0.004	0.005	0.045
	3	0.053	0.059	0.09	0.031	0.004	0.004	0.006	0.045
	4	0.054	0.055	0.07	0.031	0.004	0.004	0.004	0.034
	5	0.053	0.062	0.067	0.026	0.003	0.006	0.005	0.035
	6	0.064		0.071	0.04	0.003	0.005184	0.005	0.033
	7	0.071			0.041		0.005
	8	0.068			0.04
	9				0.039
		Flux rate constants (s-1)
		KtrAB-ATP_150mMChCl	KtrAB-ATP_150mMChCl+0.7mM Mg	KtrAB-ATP_150mMChCl+2mM Mg	KtrAB-ATP_20mMChCl	KtrAB-ADP	KtrAE125QB-ATP	KtrB-ATP	KtrAR16AB-ATP
	Mean	0.062	0.058	0.079	0.034	0.004	0.005	0.005	0.039
	SD	0.007	0.003	0.01	0.006	0.001	0.001	0.001	0.005
