# Supplementary material for: Activation of a nucleotide-dependent RCK domain requires binding of a cation cofactor to a conserved site
Source: eLife. 2019 Dec 23;8:e50661. doi: 10.7554/eLife.50661 (PMC6957272; doi:10.7554/eLife.50661)
Supplement: Figure 9—source data 1. [file elife-50661-fig9-data1.xlsx]

## Sheet: Fig9b
		Flux rate constants (s-1)
	Replica	KtrAB-ATP_5mMLiCl	KtrAB-ATP_5mMLiCl+0.7mM Mg	KtrAB-ATP_20mMLiCl	KtrAB-ATP_20mMLiCl+0.7mM Mg	KtrAB-ATP_150mMLiCl	KtrAE125QB-ATP_20mMLiCl	KtrB-ATP_20mMLiCl
	1	0.025	0.07	0.045	0.069	0.005	0.004	0.003
	2	0.019	0.07	0.045	0.073	0.004	0.004	0.003
	3	0.02	0.067	0.046	0.069	0.004	0.004	0.004
	4	0.021	0.069	0.048	0.068	0.004	0.003	0.004
		Flux rate constants (s-1)
		KtrAB-ATP_5mMLiCl	KtrAB-ATP_5mMLiCl+0.7mM Mg	KtrAB-ATP_20mMLiCl	KtrAB-ATP_20mMLiCl+0.7mM Mg	KtrAB-ATP_150mMLiCl	KtrAE125QB-ATP_20mMLiCl	KtrB-ATP_20mMLiCl
	Mean	0.021	0.069	0.046	0.07	0.004	0.004	0.003
	SD	0.003	0.001	0.001	0.002	0.001	0.001	0.001
